# Supplementary material for: Plasma Proteome Variation and its Genetic Determinants in Children and Adolescents
Source: bioRxiv or medRxiv preprint supplement (doi:10.1101/2023.03.31.23287853), 2023-03-31
Supplement: Supplementary file [file media-1.pdf]

Supplementary Table 1: Participant characteristics in the discovery and replication cohorts

|                                                       | Discovery cohort           |                         | Replication cohort  |
|-------------------------------------------------------|----------------------------|-------------------------|---------------------|
|                                                       | General population (n=951) | Obesity clinic (n=1179) | GALA-ALD/HP (n=558) |
| Age, mean (s.d.), y                                   | 12 (3)                     | 12 (3)                  | 56 (10)             |
| Female sex, No. (%)                                   | 530 (56)                   | 641 (54)                | 148 (73)            |
| Male sex, No. (%)                                     | 421 (44)                   | 538 (46)                | 410 (27)            |
| BMI, mean (s.d.), kg/m <sup>2</sup>                   | 17.7 (2.3)                 | 27.1 (5.6)              | 27.2 (5)            |
| BMI SDS, mean (s.d.)                                  | -0.05 (0.81)               | 2.77 (0.75)             | NA                  |
| Tanner stage 1/2-5, No. (%)                           | 233/474<br>(33/67)         | 327/569<br>(36/64)      | NA                  |
| ALT, median (IQR), U/L                                | 19 (16-23)                 | 24 (19-31)              | 28 (21-42)          |
| AST, median (IQR), U/L                                | 26 (22-31)                 | 24 (20-29)              | 30 (24-46)          |
| GGT, median (IQR), U/L                                | 16 (12-19)                 | 17 (15-21)              | 48 (25-136)         |
| Glucose, median (IQR), mmol/L                         | 5 (4.7-5.2)                | 5 (4.8-5.3)             | 6 (5.5-6.6)         |
| Insulin, median (IQR), pmol/L                         | 51 (36.3-68.4)             | 79 (55.1-117.8)         | NA                  |
| HbA1c, median (IQR), mmol/mol                         | 34 (32-35)                 | 34 (32-36)              | 36 (33-39)          |
| Triglycerides, median (IQR), mmol/L                   | 0.6 (0.5-0.8)              | 0.9 (0.7-1.3)           | 1.2 (0.9-1.8)       |
| Total cholesterol, median (IQR), mmol/L               | 3.9 (3.5-4.3)              | 4 (3.6-4.6)             | 5 (4.4-5.9)         |
| LDL cholesterol, median (IQR), mmol/L                 | 2 (1.7-2.4)                | 2.3 (1.9-2.8)           | 3 (2.3-3.6)         |
| HDL cholesterol, median (iQR), mmol/L                 | 1.5 (1.3-1.8)              | 1.2 (1-1.4)             | 1.3 (1.1-1.7)       |
| Abstaining from alcohol at time of inclusion, No. (%) | NA                         | NA                      | 197 (35)            |
| Statin use prior time of inclusion, No. (%)           | NA                         | NA                      | 97 (17)             |
| Steatosis 0/1/2/3, No.                                | NA                         | NA                      | 373/79/70/36        |
| Inflammatory activity 0/1/2/3/4/5, No.                | NA                         | NA                      | 290/90/78/50/28/22  |
| Fibrosis stage 0-1/2/3/4, No.                         | NA                         | NA                      | 367/102/26/63       |

BMI=body mass index; SDS=standard deviation score; IQR= Interquartile range; ALT=alanine aminotransferase; AST=aspartate aminotransferase; GGT=gamma glutamyl transferase; HbA1C=hemoglobin A1c; LDL=low-density lipoprotein; HDL=high-density lipoprotein.
